# Supplementary material
Source: PubMed Central journal article supplement (PMC2888401)
Supplement: supp_M110.105312_Ramakrishnan_etal_Supp_data_180510.pdf [file supp_M110.105312_Ramakrishnan_etal_Supp_data_180510.pdf]

| Primer              | Sequence                                      |
|---------------------|-----------------------------------------------|
| 1F                  | ACAACTGTTCGGGTCTGTGG                          |
| 2F                  | ACCAGGAGCCTTGTAACAGC                          |
| 1R                  | CAACTGTCTGAACGTCGGA                           |
| 3R                  | TCGTGAGTTCGATGTTGGTG                          |
| 2R                  | TGTTGGTGAAATCGGAGGAC                          |
| oligo(dT)17 adapter | GACTCGAGTCGACATCGATTTTTTTTTTTTTTTTTTT         |
| adapter             | GACTCGAGTCGACATCG                             |
| 6F                  | ATGCATTCCCTCTACGGTTTATC                       |
| 3'-UTR 1R           | AGATTCAGCCCTAAAAACACTCT                       |
| 7F                  | CACCGAATTC AATGCATTCCCTCTACGGTTT              |
| 6R                  | GCTCTAGATCAATTAACAGAAAGGAATGATATGA            |
| N-6-Myc 1F          | CACCGAATTCATTCGGCGATACGGACGAT                 |
| N-Myc 2F            | CACCGAATTCAGGAAACAACATGACCACGG                |
| CT-Trun 1R          | GCTCTAGAGTCACGAGCCGAAAGTCGCG                  |
| Y142W sense         | CTCACCAATGACCAGACACTATTCTGGTCAGGAATGTATAGCATG |
| Y142W anti-sense    | CATGCTATACATTCCTGACCAGAATAGTGTCTGGTCATTGGTGAG |
| Y142H sense         | CCAATGACCAGACACTATTCATTCAGGAATGTATAGCATG      |
| Y142H anti-sense    | CATGCTATACATTCCTGAATGGAATAGTGTCTGGTCATTGG     |
| R52/53A sense       | ATGATGATGCTGGTAGTCGCGTTGCGGCAGCGGACGGAAA      |
| R52/53A anti-sense  | TTTCCGTCCGCTGCCGCAACGCGACTACCAGCATCATCAT      |

Table S1. Sequences of oligonucleotide primers used in this study.

|            |     |                                                                |
|------------|-----|----------------------------------------------------------------|
| SpARC4     | 1   | MHSLYGLSPSAPAYINKAFVIVVIAASLVVNSSGRLLP-FGDTDDDDAGSRVRRADGNM    |
| AM588307.1 | 1   | MYSSLGTLFAPGDINKAFIVVVIITSSLVANSFGRLLPAFDDVDTDNGQSRVRRANGDNM   |
| AM591092.1 | 1   | MYSSILGILFAPGDINKAFIVVVIITSSLVANSFGRLLPAFDDVDTDNGQSRVRRANGDNM  |
| AM585924.1 | 1   | MYSSILGILFAPGDINKAFIVVVIITSSLVANSFGRLLPAFDDVDTDNGQSRVRRANGDNM  |
|            |     |                                                                |
| SpARC4     | 60  | TTELP-LNLGDGTTANLKAIFLGRCYDCEYCSSEEQAGLYDCSGLWDAFSSSFSYQEP CNS |
| AM588307.1 | 61  | TTAASSWEVGRGTTTNLEEIFLGRCYDCEYCSDDQKGVHNCSRLWDAFSLSFYQEP CNS   |
| AM591092.1 | 61  | TTAAPSWEVGRGTTTNLEEIFLGRCYDCEYCSDDQKGVHNCSRLWDAFSLSFYQEP CNS   |
| AM585924.1 | 61  | TTAAPSWEVGRGTTTNLEEIFLGRCYDCEYCSDDQKGVHNCSRLWDAFSLSFYQEP CNS   |
|            |     |                                                                |
| SpARC4     | 119 | VPEDFDYANMAFVPLTNDOTLFYSCMYSMAMAI GRQSSDFTNIELTMLGGLVNGITFCG   |
| AM588307.1 | 121 | DPEDFNAYTDMAFIPLAADOTLFYSCMYSIALAVGRQSSDFTNIELTMLGRLVNGITFCG   |
| AM591092.1 | 121 | DPEDFNAYTDMAFIPLAADOTLFYSCMYSIALAVGRQSSDFTNIELTMLGRLVNGITFCG   |
| AM585924.1 | 121 | DPEDFNAYTDMAFIPLAADOTLFYSCMYSIALAVGRQSSDFTNIELTMLGRLVNGITFCG   |
|            |     |                                                                |
| SpARC4     | 179 | MVDAP                                                          |
| AM588307.1 | 181 | QTDAP                                                          |
| AM591092.1 | 181 | QTDAP                                                          |
| AM585924.1 | 181 | QTDAP                                                          |

Figure S1. Multiple sequence alignment of the deduced amino acid sequence of SpARC4 with that of 3 ESTs (identified by their accession numbers) from *Paracentrotus lividus*.
